# Supplementary material for: Analysis of the Indole Diterpene Gene Cluster for Biosynthesis of the Epoxy-Janthitrems in Epichloë Endophytes
Source: PubMed Central journal article supplement (PMC6921081; doi:10.3390/microorganisms7110560), 2019-11-13
Supplement: microorganisms-07-00560-s001.pdf [file microorganisms-07-00560-s001.pdf]

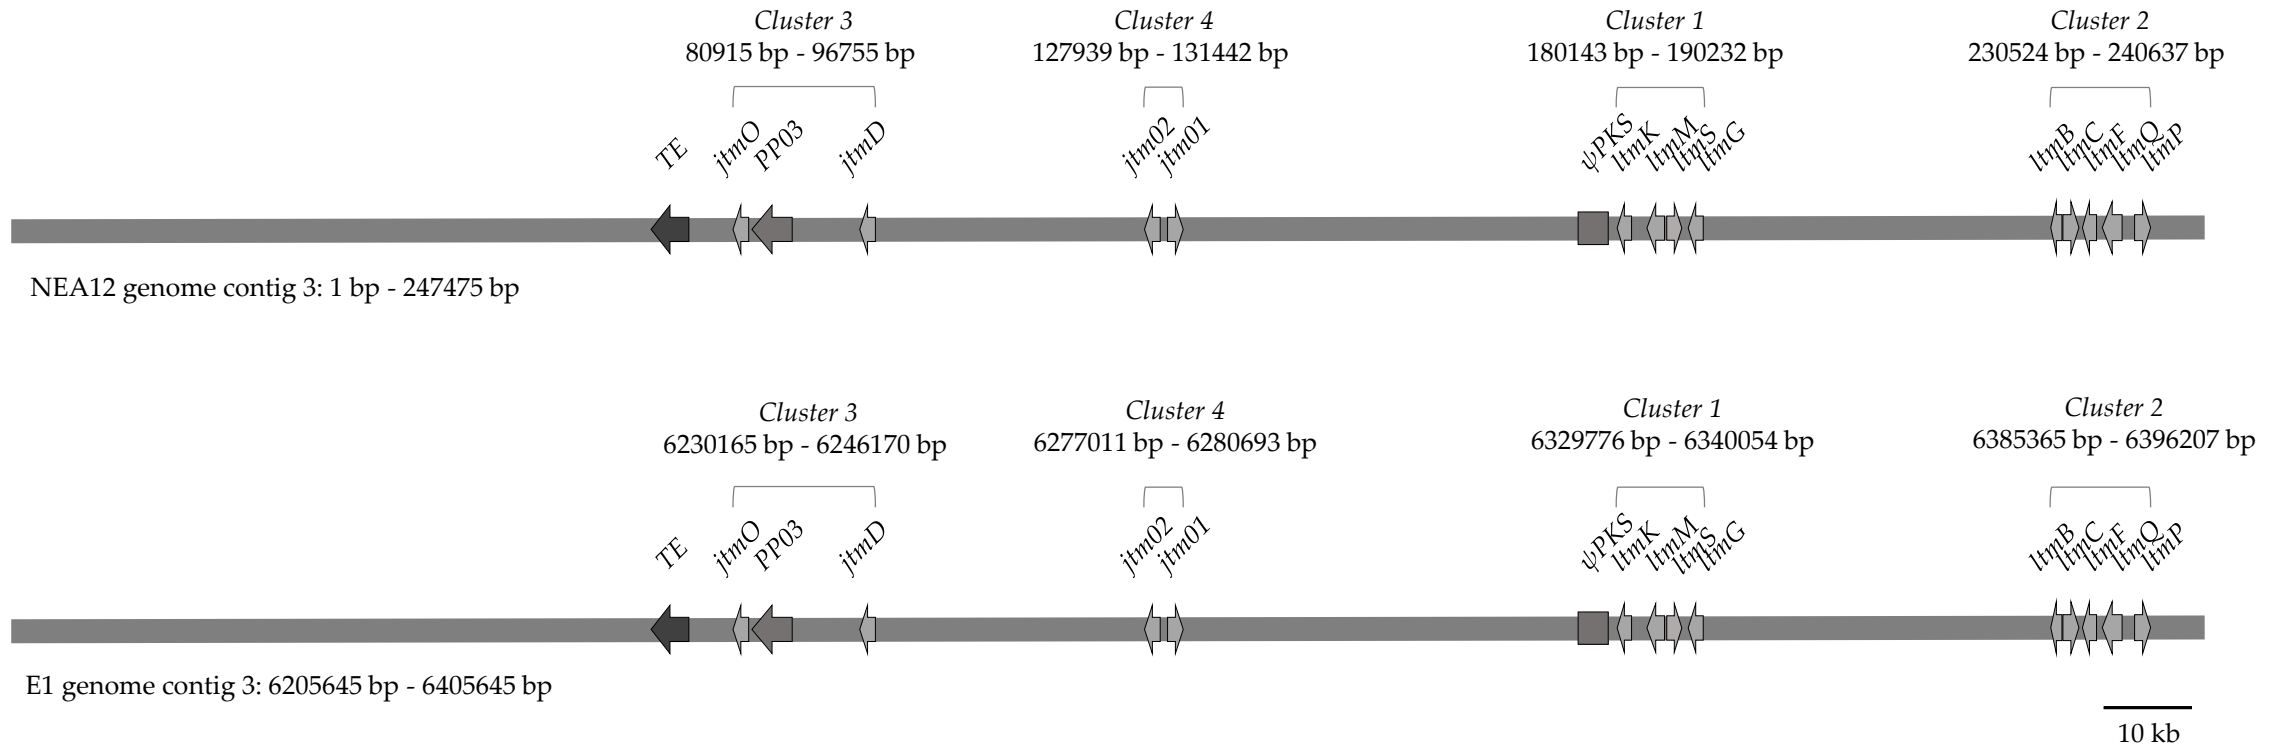

**Figure S1.** Physical map of the JTM locus in the NEA12 and E1 genomes. The JTM locus has 13 predicted and known genes in four clusters. Cluster 1 (*ltmG*, *ltmS*, *ltmM*, *ltmK*), Cluster 2 (*ltmP*, *ltmQ*, *ltmF*, *ltmC*, *ltmB*), Cluster 3 (*jtmD* and *jtmO*) and Cluster 4 (*jtm01*, *jtm02*). Light grey arrows display predicted and known genes and their orientation. The locations of the *pks* pseudogene, transposase with a MULE domain (*PP03*) and Helitron helicase-like transposable element (TE) are also shown. PP = predicted protein; TE = transposable element;  $\psi$  = pseudogene.

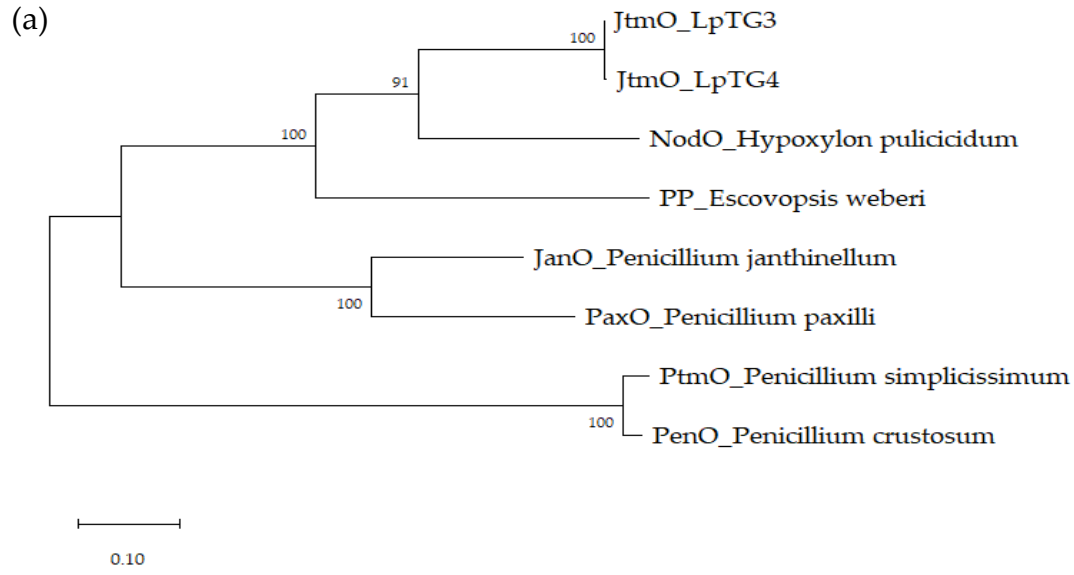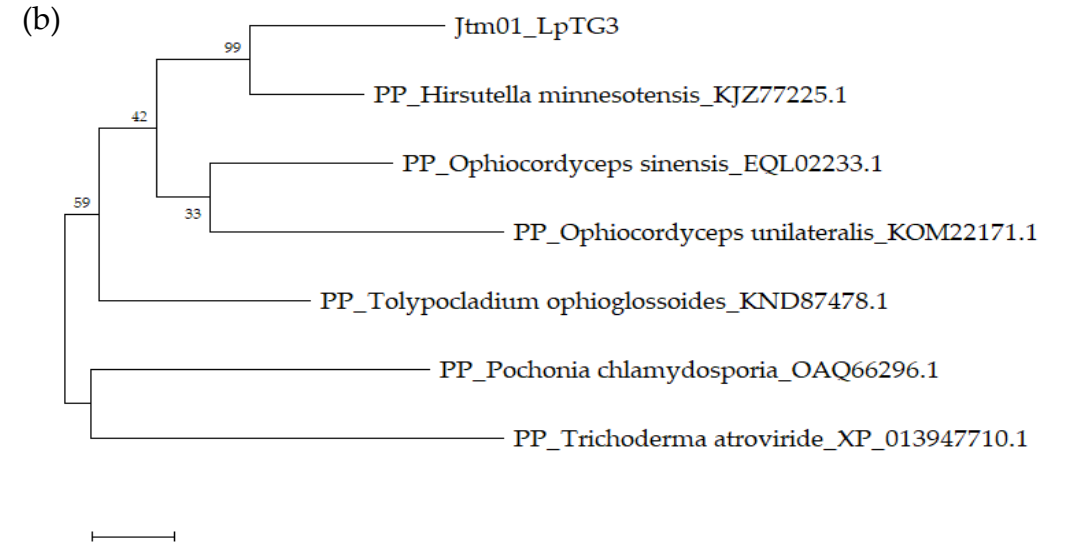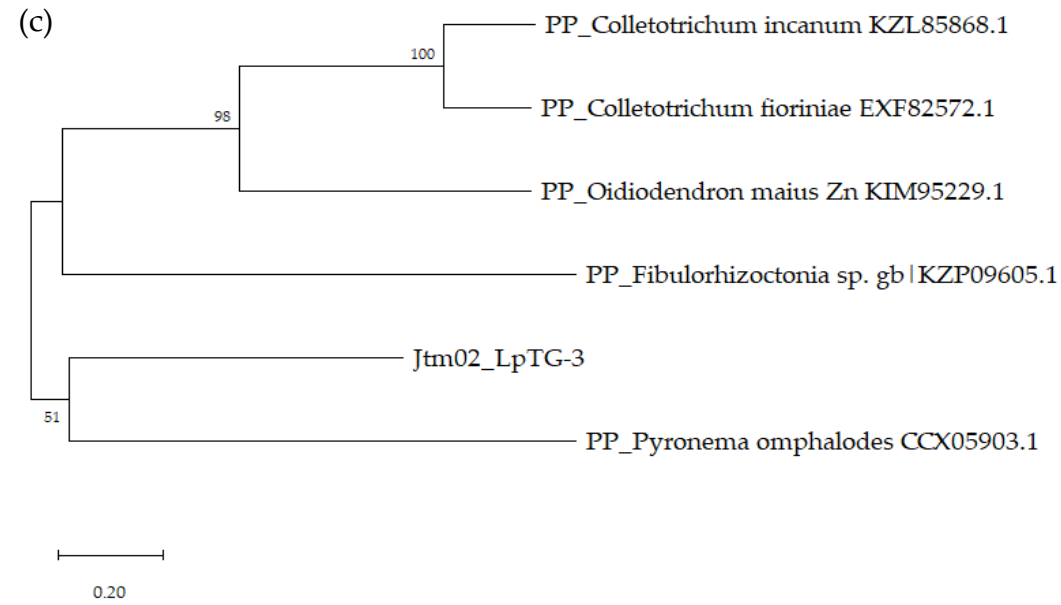

**Figure S2.** Trees generated through ML analysis of the predicted amino acid sequence of JTM locus genes from NEA12 and E1 and selected top BLASTp hits in the NCBI database. Genbank accession number and percent amino acid identity created by Clustal2.1, and species name is provided for each protein. **(a)** JtmO, exhibits sequence similarity to FAD-binding oxidoreductases: NodO (AUM60052.1; *H. pulicicidum*; 70%); PP (KOS22754.1; *E. weberi*; 60%); JanO (AGZ20488.1; *P. janthinellum*; 52%); PaxO (ADO29935.1; *P. paxilli*; 49%); PtmO (BAU61564.1; *P. simplicissimum*; 43%); PenO (AGZ20199.1; *P. crustosum*; 43%). The predicted protein sequence of JtmO from NEA12 (MN508663) and E1 (MN508664) are 99.79% identical; Jtm01 from E1 is 470 amino acids, the 479 aa NEA12 protein has a n amino acid insertion at position 12 and an amino acid variation (T/A) at position 326. **(b)** Jtm01, with a 387 aa protein sequence, exhibits sequence similarity to cytochrome P450 monooxygenases: KJZ77225.1 (68%; *H. minnesotensis* 3608); EQL02233.1 (57%; *Ophiocordyceps sinensis* CO18); KND87478.1 (53%; *Tolypocladium ophioglossoides* CBS 100239); OAQ66296.1 (50%; *Pochonia chlamydosporia* 170); KOM22171.1 (55%; *O. unilateralis*); XP\_013947710.1 (48%; *Trichoderma atroviride* IMI 206040). The predicted protein sequence of Jtm01 from NEA12 (MN508667) and E1 (MN508668) are identical. **(c)** Jtm02, with a 315 aa protein sequence, exhibits sequence similarity to MBOAT proteins: KIM95229.1 (33%; *Oidiodendron maius* Zn); KZL85868.1(30%; *Colletotrichum incanum*); CCX05903.1 (30%; *Pyronema omphalodes* CBS 100304); KZP09605.1 (29%; *Fibulorhizoctonia* sp. CBS 109695); XP\_007593790.1 (31%; *Colletotrichum fioriniae* PJ7). The predicted protein sequence of Jtm02 from NEA12 (MN508665) and E1 (MN508666) are identical. PP: Predicted protein.

(a)

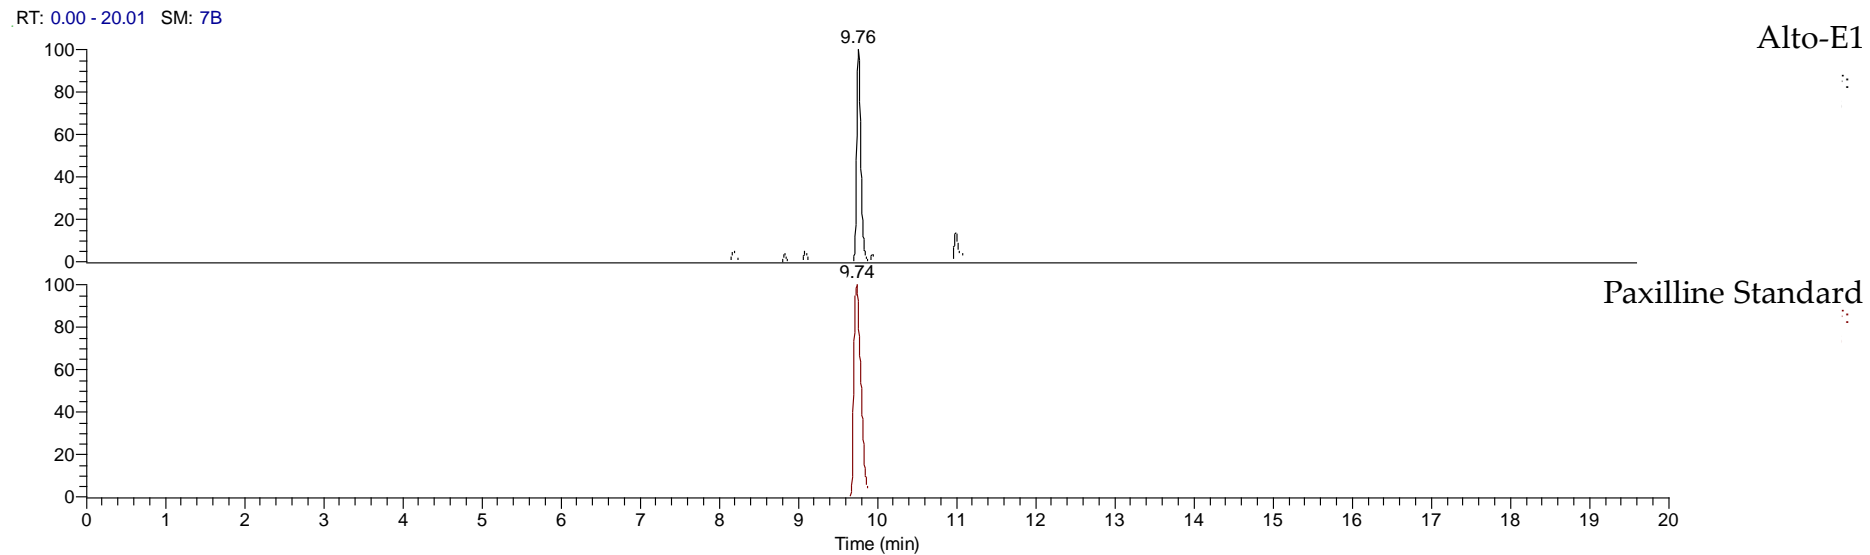

paxilline #2114 RT: 9.75 AV: 1 NL: 5.52E4  
F: FTMS + p ESI d Full ms2 436.2483@hcd30.00 [50.0000-465.0000]

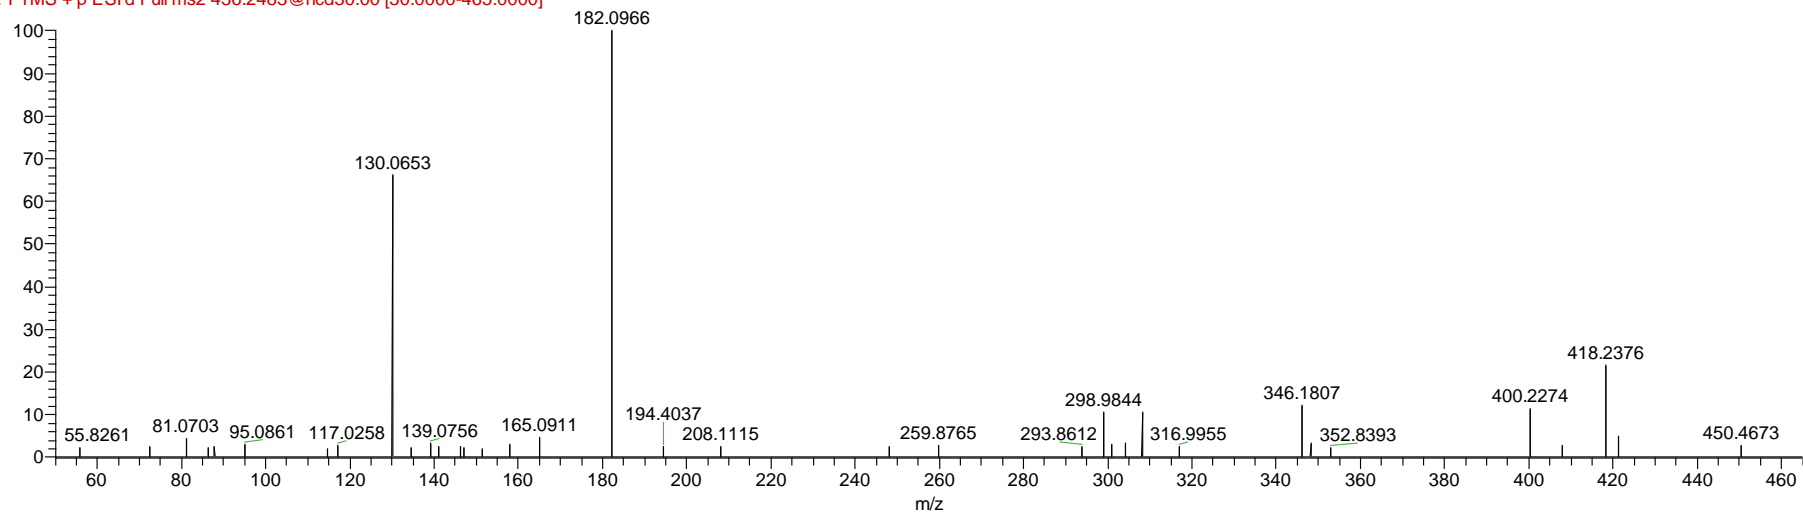

(b)

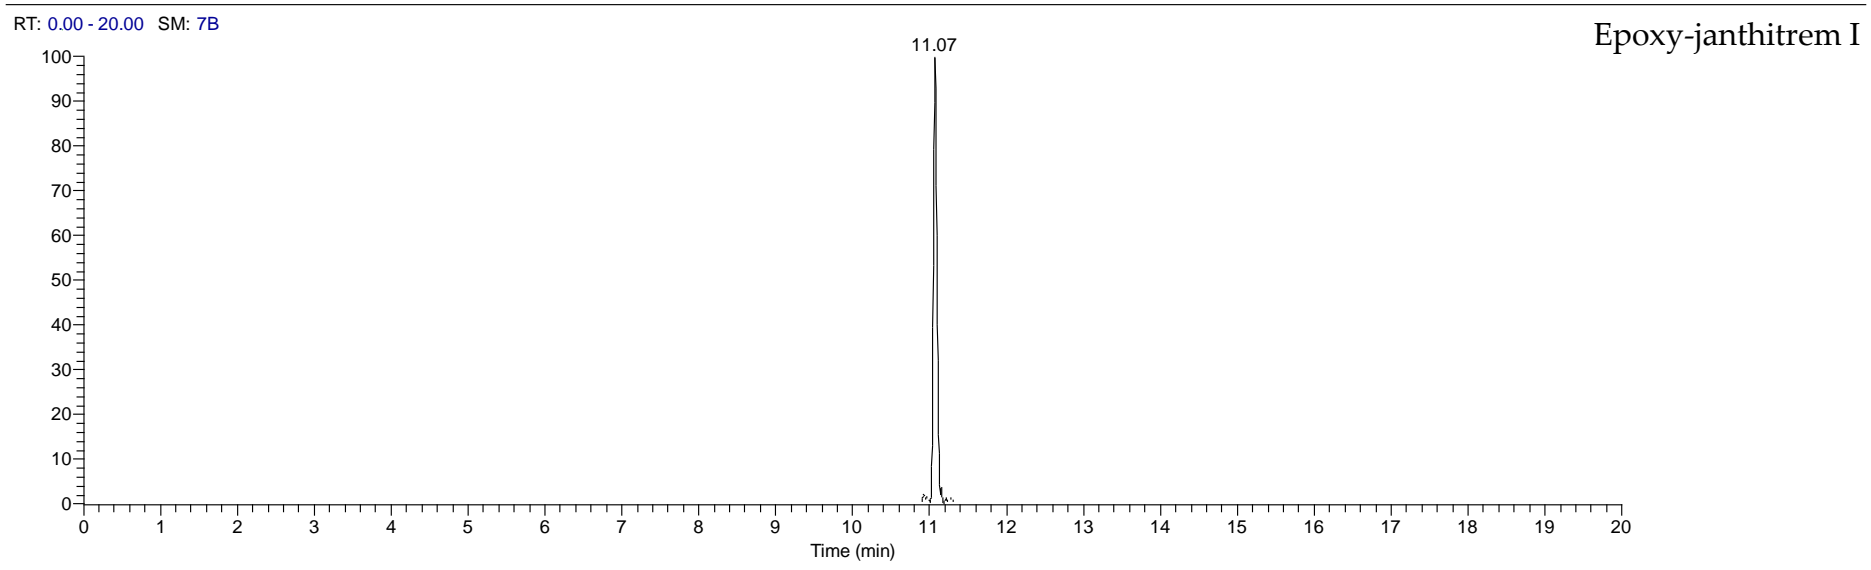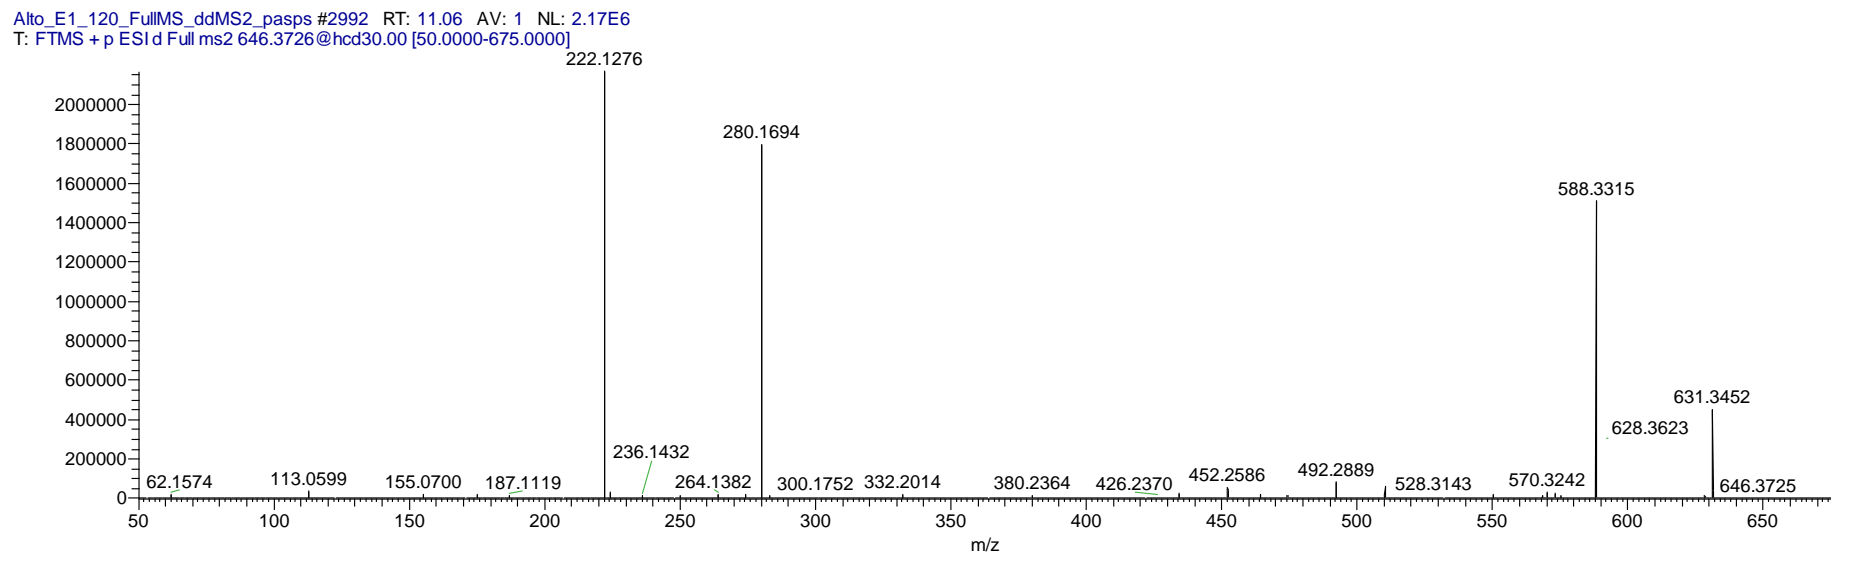

(c)

RT: 0.00 - 20.00 SM: 7B

Epoxy-janthitrem II

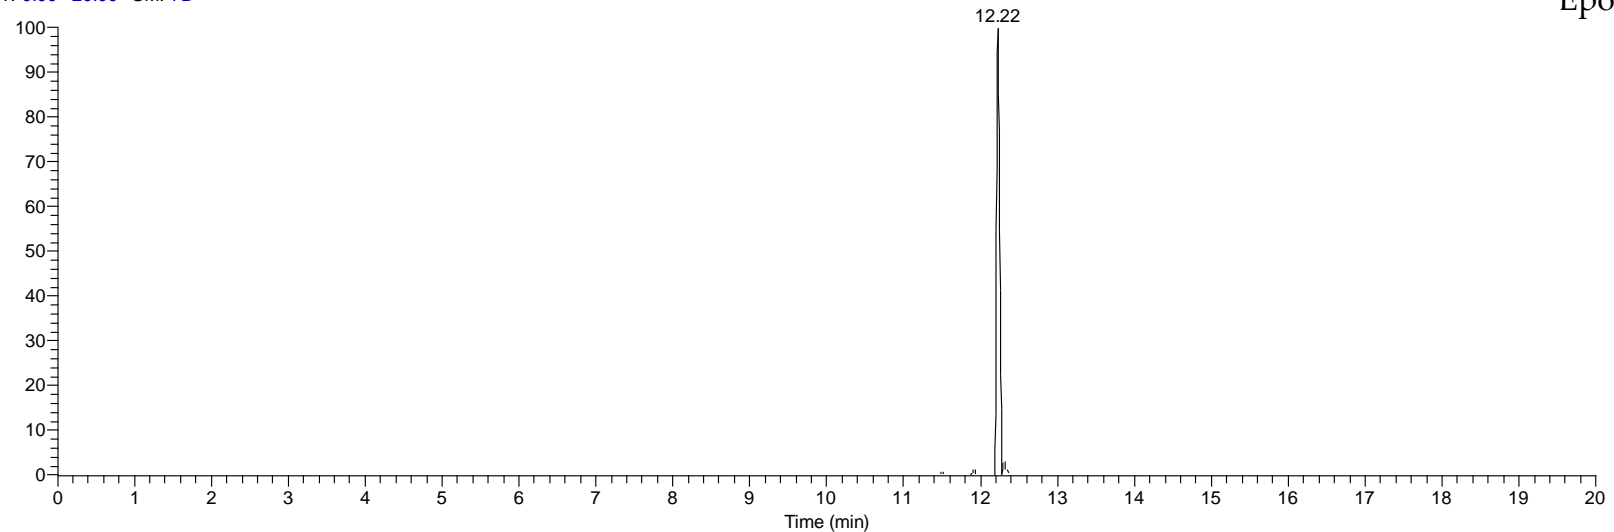

Alto\_E1\_120\_FullMS\_ddMS2\_pasps #3383 RT: 12.22 AV: 1 NL: 1.42E6  
T: FTMS + p ESI d Full ms2 670.4078@hcd30.00 [50.0000-700.0000]

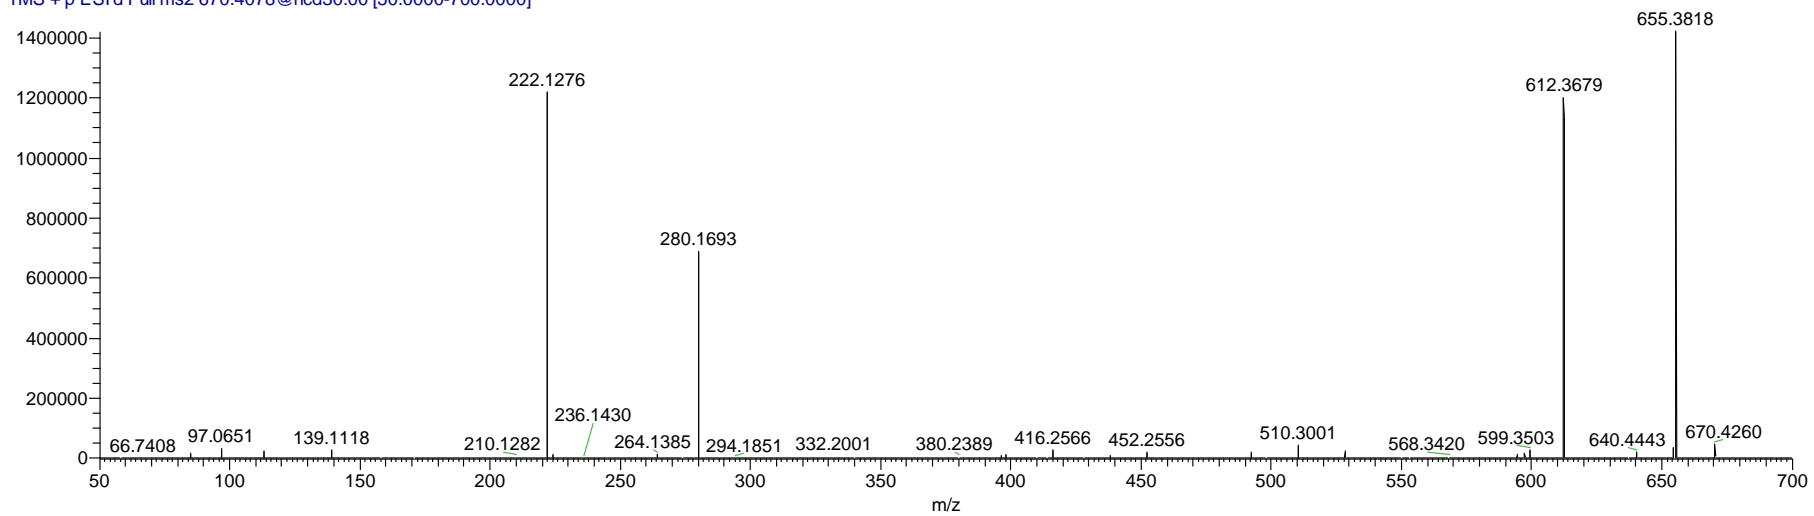

(d)

RT: 0.00 - 20.01 SM: 7B

Epoxy-janthitrem III

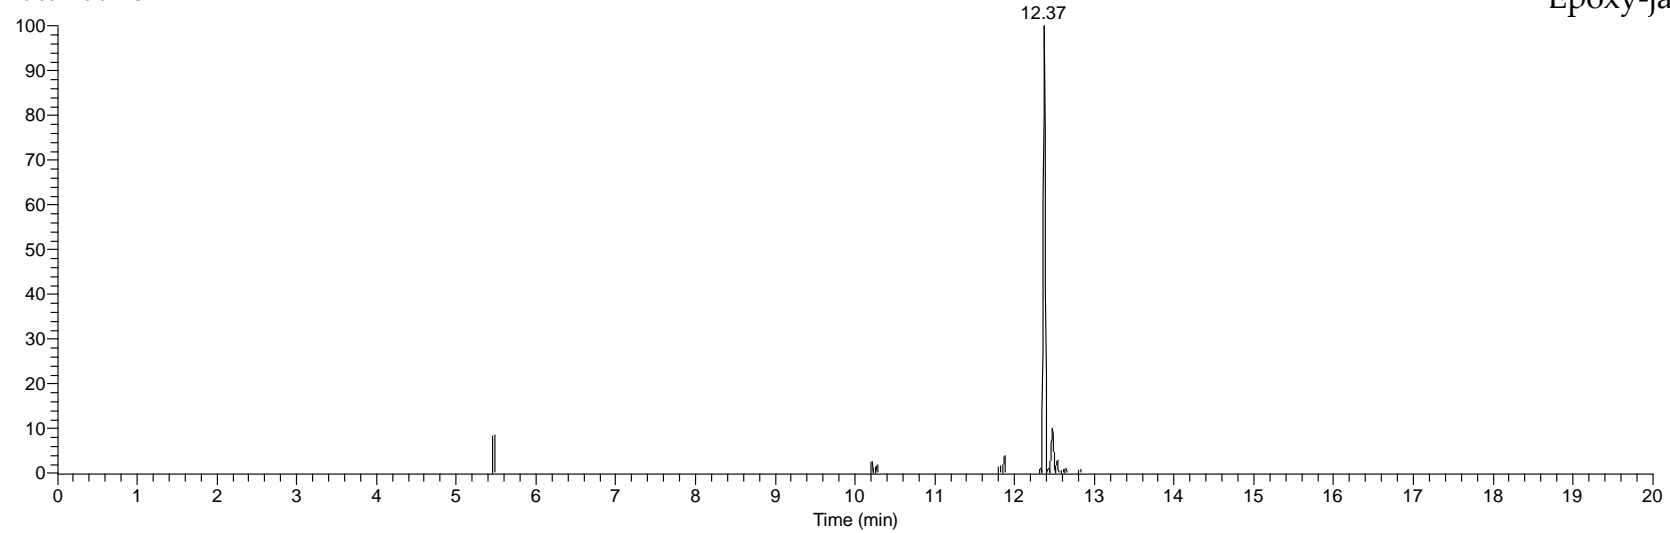

Alto\_E1\_120\_FullMS\_ddMS2\_pasps #3456 RT: 12.37 AV: 1 NL: 6.01E4  
T: FTMS + p ESI d Full ms2 672.4221@hcd30.00 [50.0000-705.0000]

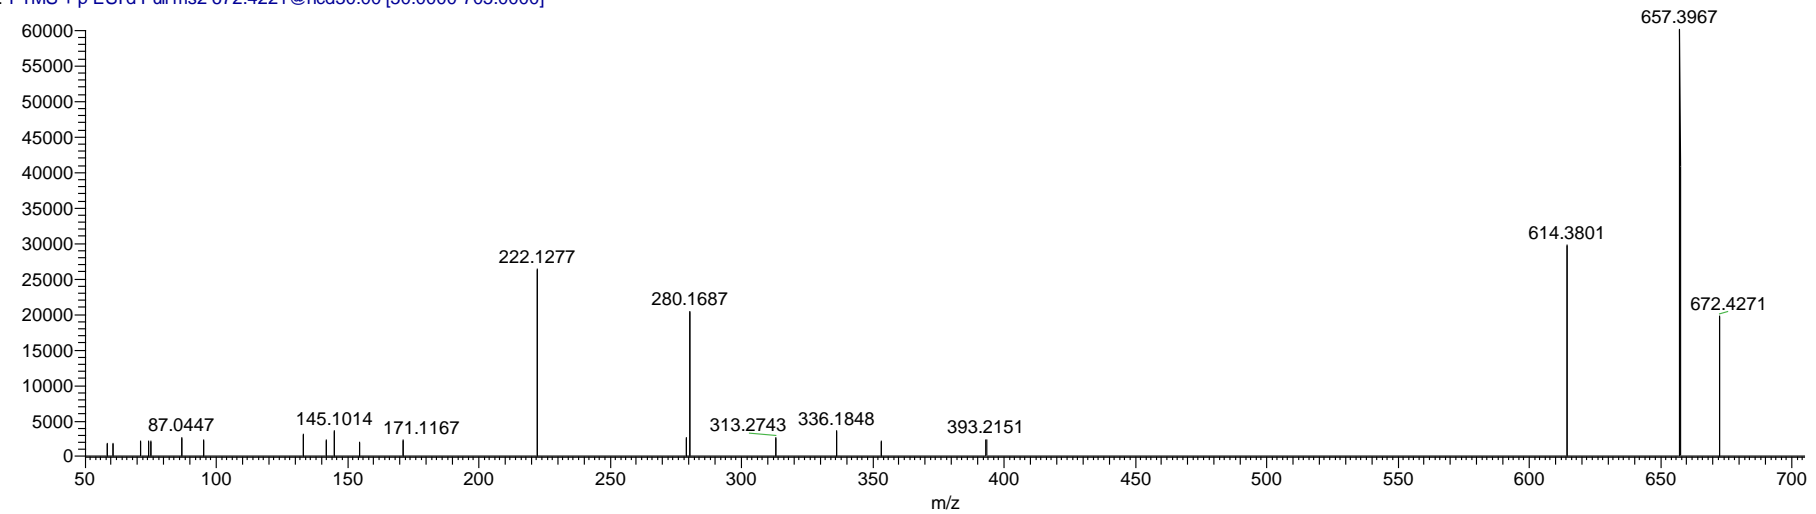

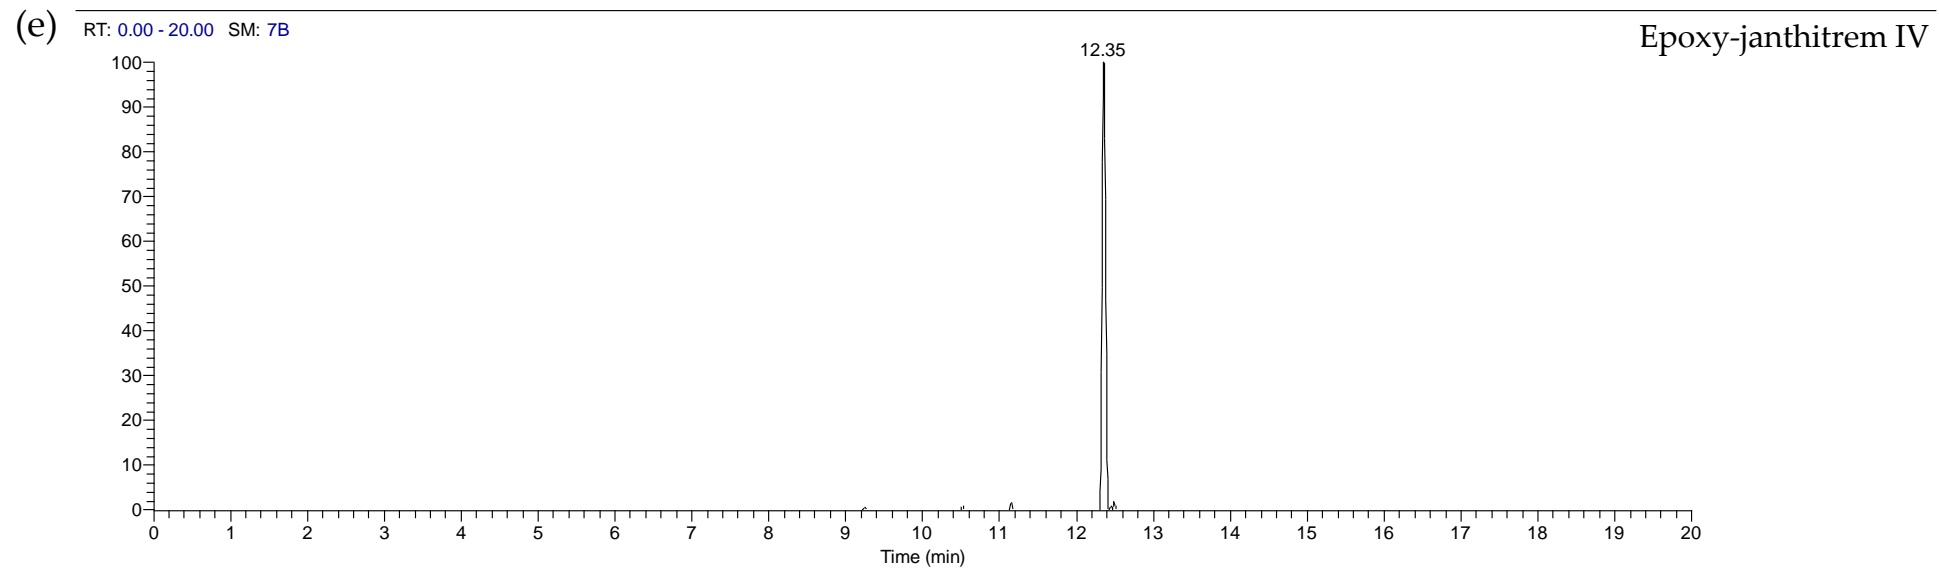

Alto\_E1\_120\_FullMS\_ddMS2\_pasps #3446 RT: 12.35 AV: 1 NL: 2.46E5  
T: FTMS + p ESI d Full ms2 714.4329@hcd30.00 [50.0000-745.0000]

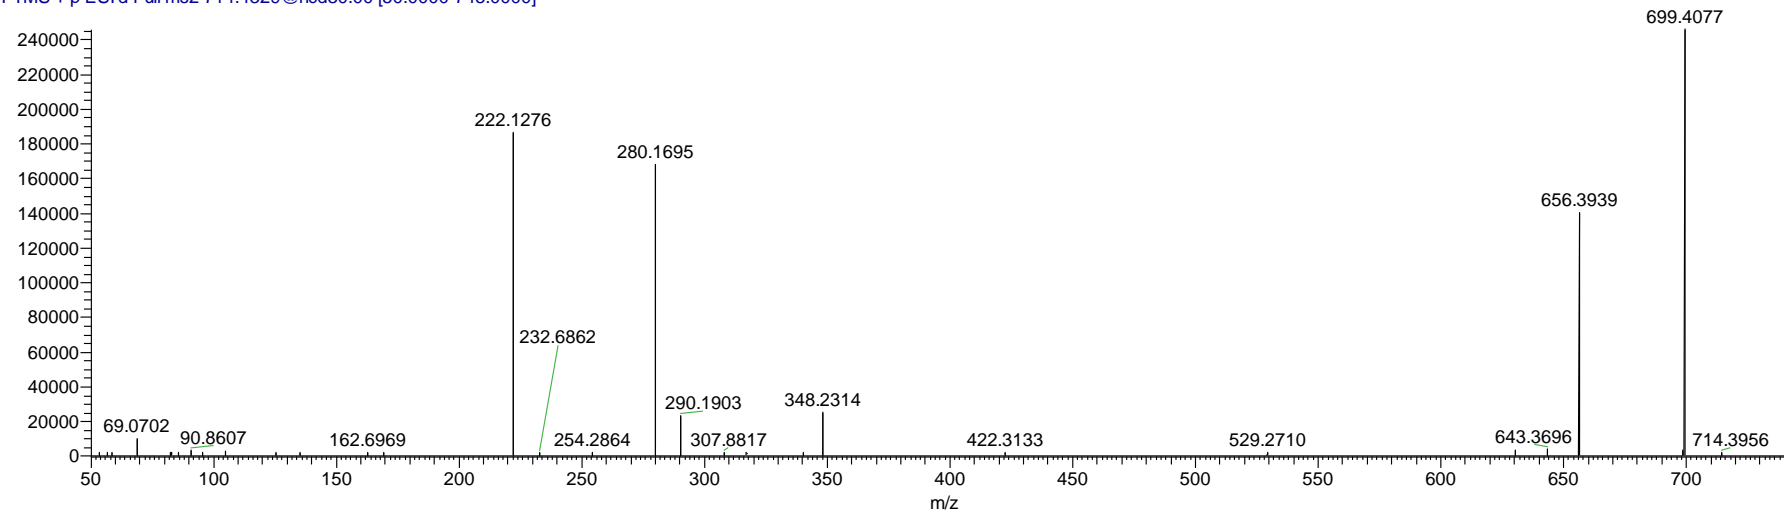

**Figure S3.** Extracted ion chromatogram (EIC) and MS<sup>2</sup> fragments of: (a) paxilline in planta and matched to a chemical standard  $m/z$  436.2483 at 9.76 min; (b) epoxy-janthitrem I in planta,  $m/z$  646.3726 at 11.07 min; (c), epoxy-janthitrem II in planta,  $m/z$  670.4078 at 12.22 min; (d) epoxy-janthitrem III in planta,  $m/z$  672.4221 at 12.37 min; and (e) epoxy-janthitrem IV in planta,  $m/z$  714.4329 at 12.35 min. Metabolites were observed in perennial ryegrass-*Lp*TG-4 associations (Alto-E1), collected from 0–20 min in positive ionisation mode (ESI+).
